# Supplementary material for: Young endurance training starting age in non-elite athletes is associated with higher proximal aortic distensibility
Source: HighWire-hosted journal article supplement (doi:10.1136/openhrt-2021-001771), 2022-03-01
Supplement: openhrt-2021-001771supp001_data_supplement.pdf [file openhrt-2021-001771supp001_data_supplement.pdf]

## Athlete study LVH

Date: \_\_\_/\_\_\_/\_\_\_ Study-Nr. \_\_\_\_\_

**Engagement in sports disciplines outside school PE in the past**

|                                                                                                                                                                                                                                                                                                                                                                                                                                                                                                                                                        |                                                                                                                                                                                                                                                                                                                                                                                                                                                                                                                                                                                                                                                                              |
|--------------------------------------------------------------------------------------------------------------------------------------------------------------------------------------------------------------------------------------------------------------------------------------------------------------------------------------------------------------------------------------------------------------------------------------------------------------------------------------------------------------------------------------------------------|------------------------------------------------------------------------------------------------------------------------------------------------------------------------------------------------------------------------------------------------------------------------------------------------------------------------------------------------------------------------------------------------------------------------------------------------------------------------------------------------------------------------------------------------------------------------------------------------------------------------------------------------------------------------------|
| <b>1) Sports discipline</b> (please number all disciplines that you have performed for at least one year in consecutive descending order according to number of years that you have performed them):                                                                                                                                                                                                                                                                                                                                                   |                                                                                                                                                                                                                                                                                                                                                                                                                                                                                                                                                                                                                                                                              |
| <input type="checkbox"/> Badminton IC<br><input type="checkbox"/> Basketball IIC<br><input type="checkbox"/> Boxing IIC<br><input type="checkbox"/> Curling IA<br><input type="checkbox"/> Eishockey IIC<br><input type="checkbox"/> Figure skating IIB<br><input type="checkbox"/> Soccer IC<br><input type="checkbox"/> Weightlifting IIIA<br><input type="checkbox"/> Golf IA<br><input type="checkbox"/> Gymnastics IIIA<br><input type="checkbox"/> Fencing IB<br><input type="checkbox"/> Handball IIC<br><input type="checkbox"/> Climbing IIIA | <input type="checkbox"/> Strength training IIIA<br><input type="checkbox"/> Cross-country skiing (Classical) IC<br><input type="checkbox"/> Cross-country skiing (Skating) IIC<br><input type="checkbox"/> Running (middle distances) IIC<br><input type="checkbox"/> Athletics (Sprinting) IIB<br><input type="checkbox"/> Athletics (Jumping) IIB<br><input type="checkbox"/> Athletics (Throwing) IIIA<br><input type="checkbox"/> Orienteering IC<br><input type="checkbox"/> Cycling IIIC<br><input type="checkbox"/> Rowing IIIC<br><input type="checkbox"/> Running (long distances) IC<br><input type="checkbox"/> Rugby IIB<br><input type="checkbox"/> Shooting IA |
| <input type="checkbox"/> Swimming IIC<br><input type="checkbox"/> Sailing IIIA<br><input type="checkbox"/> Skiing IIIB<br><input type="checkbox"/> Snowboarding IIIB<br><input type="checkbox"/> Synchronised swimming IIB<br><input type="checkbox"/> Diving IIA<br><input type="checkbox"/> Tennis IC<br><input type="checkbox"/> Table tennis IB<br><input type="checkbox"/> Triathlon IIIC<br><input type="checkbox"/> Unihockey IC<br><input type="checkbox"/> Volleyball IB<br><input type="checkbox"/> Yoga IA                                  |                                                                                                                                                                                                                                                                                                                                                                                                                                                                                                                                                                                                                                                                              |
| <b>2) Age at start and end</b> (please indicate training interruptions of >1 year):                                                                                                                                                                                                                                                                                                                                                                                                                                                                    | <b>3) Mean Training hours per week until age 18</b> (please indicate number of weeks per year if not performed for the whole year):                                                                                                                                                                                                                                                                                                                                                                                                                                                                                                                                          |
| Sports discipline 1 ___ / ___                                                                                                                                                                                                                                                                                                                                                                                                                                                                                                                          | Sports discipline 1 ___                                                                                                                                                                                                                                                                                                                                                                                                                                                                                                                                                                                                                                                      |
| Sports discipline 2 ___ / ___                                                                                                                                                                                                                                                                                                                                                                                                                                                                                                                          | Sports discipline 2 ___                                                                                                                                                                                                                                                                                                                                                                                                                                                                                                                                                                                                                                                      |
| Sports discipline 3 ___ / ___                                                                                                                                                                                                                                                                                                                                                                                                                                                                                                                          | Sports discipline 3 ___                                                                                                                                                                                                                                                                                                                                                                                                                                                                                                                                                                                                                                                      |
| Sports discipline 4 ___ / ___                                                                                                                                                                                                                                                                                                                                                                                                                                                                                                                          | Sports discipline 4 ___                                                                                                                                                                                                                                                                                                                                                                                                                                                                                                                                                                                                                                                      |
| Sports discipline 5 ___ / ___                                                                                                                                                                                                                                                                                                                                                                                                                                                                                                                          | Sports discipline 5 ___                                                                                                                                                                                                                                                                                                                                                                                                                                                                                                                                                                                                                                                      |
| Sports discipline 6 ___ / ___                                                                                                                                                                                                                                                                                                                                                                                                                                                                                                                          | Sports discipline 6 ___                                                                                                                                                                                                                                                                                                                                                                                                                                                                                                                                                                                                                                                      |
| Sports discipline 7 ___ / ___                                                                                                                                                                                                                                                                                                                                                                                                                                                                                                                          | Sports discipline 7 ___                                                                                                                                                                                                                                                                                                                                                                                                                                                                                                                                                                                                                                                      |
| <b>4) Mean Training hours per week after age 18</b> (please indicate number of weeks per year if not performed for the whole year):                                                                                                                                                                                                                                                                                                                                                                                                                    | <b>5) Mean Competition hours per year:</b>                                                                                                                                                                                                                                                                                                                                                                                                                                                                                                                                                                                                                                   |
| Sports discipline 1 ___                                                                                                                                                                                                                                                                                                                                                                                                                                                                                                                                | Sports discipline 1 ___                                                                                                                                                                                                                                                                                                                                                                                                                                                                                                                                                                                                                                                      |
| Sports discipline 2 ___                                                                                                                                                                                                                                                                                                                                                                                                                                                                                                                                | Sports discipline 2 ___                                                                                                                                                                                                                                                                                                                                                                                                                                                                                                                                                                                                                                                      |
| Sports discipline 3 ___                                                                                                                                                                                                                                                                                                                                                                                                                                                                                                                                | Sports discipline 3 ___                                                                                                                                                                                                                                                                                                                                                                                                                                                                                                                                                                                                                                                      |
| Sports discipline 4 ___                                                                                                                                                                                                                                                                                                                                                                                                                                                                                                                                | Sports discipline 4 ___                                                                                                                                                                                                                                                                                                                                                                                                                                                                                                                                                                                                                                                      |
| Sports discipline 5 ___                                                                                                                                                                                                                                                                                                                                                                                                                                                                                                                                | Sports discipline 5 ___                                                                                                                                                                                                                                                                                                                                                                                                                                                                                                                                                                                                                                                      |
| Sports discipline 6 ___                                                                                                                                                                                                                                                                                                                                                                                                                                                                                                                                | Sports discipline 6 ___                                                                                                                                                                                                                                                                                                                                                                                                                                                                                                                                                                                                                                                      |
| Sports discipline 7 ___                                                                                                                                                                                                                                                                                                                                                                                                                                                                                                                                | Sports discipline 7 ___                                                                                                                                                                                                                                                                                                                                                                                                                                                                                                                                                                                                                                                      |
| <b>6) Were there any drastic changes in your sporting behaviour at any point? (When, What?)</b>                                                                                                                                                                                                                                                                                                                                                                                                                                                        |                                                                                                                                                                                                                                                                                                                                                                                                                                                                                                                                                                                                                                                                              |
| _____<br>_____<br>_____                                                                                                                                                                                                                                                                                                                                                                                                                                                                                                                                |                                                                                                                                                                                                                                                                                                                                                                                                                                                                                                                                                                                                                                                                              |
| <b>7) Did you complete part or all of your way to school by bicycle or foot? If so, please indicate bicycle or foot, km/day, number of years for the different schools/periods.</b>                                                                                                                                                                                                                                                                                                                                                                    |                                                                                                                                                                                                                                                                                                                                                                                                                                                                                                                                                                                                                                                                              |
| _____<br>_____<br>_____                                                                                                                                                                                                                                                                                                                                                                                                                                                                                                                                |                                                                                                                                                                                                                                                                                                                                                                                                                                                                                                                                                                                                                                                                              |

## Athlete study LVH

**8) Were you overweight as a child or teenager? \_\_\_\_\_**

**9) Please describe your sports history in one or two sentences.**

\_\_\_\_\_

\_\_\_\_\_

(E.g., until I was 30 years old I was not involved in any sports at all, from then on I did endurance sports such as running or swimming on a daily basis.)

**10) How old are you now: \_\_\_\_years**
