# Supplementary material for: Young endurance training starting age in non-elite athletes is associated with higher proximal aortic distensibility
Source: HighWire-hosted journal article supplement (doi:10.1136/openhrt-2021-001771), 2022-03-01
Supplement: openhrt-2021-001771supp002_data_supplement.pdf [file openhrt-2021-001771supp002_data_supplement.pdf]

Supplement Table 1: Comparison of anthropometric and echocardiographic parameters of athletes included and excluded in the present study. Shown are mean  $\pm$  standard deviation or median (Q1, Q3), and p-values for independent t-tests or Mann-Whitney-U tests as appropriate.

| Variable                                  | Included athletes<br>(n = 92) | Excluded athletes<br>(n = 82) | P-Value |
|-------------------------------------------|-------------------------------|-------------------------------|---------|
| <i>Athlete characteristics</i>            |                               |                               |         |
| Age (years)                               | 42.0 $\pm$ 7.7                | 41.2 $\pm$ 7.3                | 0.481   |
| BMI (kg/m <sup>2</sup> )                  | 22.8 $\pm$ 1.6                | 23.2 $\pm$ 2.1                | 0.262   |
| BSA (m <sup>2</sup> )                     | 1.9 $\pm$ 0.1                 | 1.9 $\pm$ 0.1                 | 0.694   |
| Resting heart rate (bpm)                  | 59.3 $\pm$ 10.3               | 62.1 $\pm$ 11.0               | 0.084   |
| Systolic BP at rest (mmHg)                | 121.6 $\pm$ 9.1               | 123.7 $\pm$ 8.7               | 0.120   |
| Diastolic BP at rest (mmHg)               | 75.9 $\pm$ 6.6                | 77.1 $\pm$ 6.8                | 0.234   |
| Pulse pressure                            | 45.8 $\pm$ 7.7                | 46.7 $\pm$ 6.8                | 0.419   |
| <i>Echocardiography</i>                   |                               |                               |         |
| LA volume/BSA (ml/m <sup>2</sup> )        | 31.7 $\pm$ 6.5                | 30.3 $\pm$ 6.6                | 0.163   |
| LV mass/BSA (g/m <sup>2</sup> )           | 104.9 $\pm$ 18.7              | 101.8 $\pm$ 16.7              | 0.252   |
| LV concentricity (g/ml <sup>2/3</sup> )   | 8.4 $\pm$ 1.5                 | 8.4 $\pm$ 1.5                 | 0.895   |
| LV EDV/BSA (ml/m <sup>2</sup> )           | 61.6 $\pm$ 12.4               | 59.6 $\pm$ 11.8               | 0.272   |
| LV ejection fraction (%)                  | 64.0 $\pm$ 5.3                | 64.4 $\pm$ 4.4                | 0.540   |
| LV stroke volume/BSA (ml/m <sup>2</sup> ) | 39.4 $\pm$ 8.3                | 38.3 $\pm$ 7.7                | 0.394   |
| E peak (cm/s)                             | 74.8 $\pm$ 16.0               | 76.1 $\pm$ 11.8               | 0.559   |
| E' mean (cm/s)                            | 12.8 $\pm$ 2.1                | 12.2 $\pm$ 1.9                | 0.180   |
| E peak/E mean                             | 6.1 $\pm$ 1.3                 | 6.0 $\pm$ 1.1                 | 0.813   |
| E/A                                       | 1.6 $\pm$ 0.4                 | 1.6 $\pm$ 0.3                 | 0.245   |
| <i>Sports performance parameters</i>      |                               |                               |         |
| 10 mile race time (min)                   | 69 (62, 77) [n=91]            | 70 (64, 75) [n=76]            | 0.592   |
