# Supplementary material for: Young endurance training starting age in non-elite athletes is associated with higher proximal aortic distensibility
Source: HighWire-hosted journal article supplement (doi:10.1136/openhrt-2021-001771), 2022-03-01
Supplement: openhrt-2021-001771supp003_data_supplement.pdf [file openhrt-2021-001771supp003_data_supplement.pdf]

Supplement Table 2: Spearman correlation coefficients between Aortic distensibility and variables of training history

|                   | Distensibility | Age    | Age at ET Start | Total ET hours | Yearly ET hours | ET years  | 10-Mile race time |
|-------------------|----------------|--------|-----------------|----------------|-----------------|-----------|-------------------|
| Distensibility    | 1.000          | -0.174 | -0.386***       | 0.277          | 0.131           | 0.276*    | -0.224            |
| Age               |                | 1.000  | 0.456***        | 0.144          | -0.087          | 0.276***  | 0.092             |
| Age at ET Start   |                |        | 1.000           | -0.578**       | -0.143          | -0.703*** | 0.608***          |
| Total ET hours    |                |        |                 | 1.000          | 0.669***        | 0.751***  | -0.699***         |
| Yearly ET hours   |                |        |                 |                | 1.000           | 0.078     | -0.472***         |
| ET years          |                |        |                 |                |                 | 1.000     | -0.588***         |
| 10-Mile race time |                |        |                 |                |                 |           | 1.000             |

\*, p-value < 0.05; \*\*\*, p-value < 0.001;
